# Supplementary material
Source: publisher site journal article supplement (https://www.dovepress.com/article/180491)
Supplement: Supplementary file 1 [file get_supplementary_file.php]

## SUPPLEMENTARY MATERIAL

**Table S1.** Overview of available clinical evidence from the randomized controlled trials of biologics

| Interventions | Trial                   | Population                               |                                         | Data on response/<br>remission with<br>induction therapy |               | Data on sustained response/remission with<br>maintenance therapy up to 1 year |                                                                                |                         |
|---------------|-------------------------|------------------------------------------|-----------------------------------------|----------------------------------------------------------|---------------|-------------------------------------------------------------------------------|--------------------------------------------------------------------------------|-------------------------|
|               |                         | Anti-<br>TNF-<br>naive<br>UC<br>patients | Anti-TNF-<br>experienced<br>UC patients | Available                                                | Time<br>point | Available                                                                     | Re-randomization/re-<br>allocation of<br>treatment after<br>induction response | Time-frame <sup>a</sup> |
| Infliximab    | ACT-1 <sup>1</sup>      | X                                        |                                         | X                                                        | Week 8        | X                                                                             | No                                                                             | Weeks 8–54 <sup>b</sup> |
|               | ACT-2 <sup>1</sup>      | X                                        |                                         | X                                                        | Week 8        |                                                                               |                                                                                |                         |
| Adalimumab    | ULTRA 1 <sup>2</sup>    | X                                        |                                         | X                                                        | Week 8        |                                                                               |                                                                                |                         |
|               | ULTRA 2 <sup>3</sup>    | X                                        | X                                       | X                                                        | Week 8        | X                                                                             | No                                                                             | Weeks 8–52 <sup>c</sup> |
| Golimumab     | PURSUIT-SC <sup>4</sup> | X                                        |                                         | X                                                        | Week 6        |                                                                               |                                                                                |                         |
|               | PURSUIT-M <sup>5</sup>  | X                                        |                                         |                                                          |               | X                                                                             | Yes, at week 6 of<br>PURSUIT-SC, which is<br>week 0 of PURSUIT-M               | Weeks 6–60 <sup>d</sup> |
| Vedolizumab   | GEMINI-1 <sup>6</sup>   | X                                        | X                                       | X                                                        | Week 6        | X                                                                             | Yes, at week 6                                                                 | Weeks 6–52 <sup>e</sup> |

<sup>a</sup>Week 0 is defined as beginning of induction therapy.

<sup>b</sup>Response/remission at weeks 8, 30, and 54.

<sup>c</sup>Response/remission at both weeks 8 and 52.

<sup>d</sup>Maintenance of response through week 54 among induction responders (week 0 in maintenance trial); maintenance of remission through week 54 among patients in remission with induction therapy (week 0 in maintenance trial).

<sup>e</sup>Response/remission at weeks 6 and 52.

**Abbreviations:** TNF, tumor necrosis factor; UC, ulcerative colitis.

**Table S2.** Baseline patient characteristics by trial at start of induction therapy

| Trial                   | Interventions           | Anti-TNF-naïve patients (%) | Male patients | Age (years)       | Weight (kg)       | Disease duration (years) | Mayo score       | Concomitant therapy (%) |              |                 | Disease location (%) |            |       |
|-------------------------|-------------------------|-----------------------------|---------------|-------------------|-------------------|--------------------------|------------------|-------------------------|--------------|-----------------|----------------------|------------|-------|
|                         |                         |                             |               |                   |                   |                          |                  | Amino-salicylates       | Azathioprine | Corticosteroids | Extensive            | Left-sided | Other |
| ACT-1 <sup>1</sup>      | Placebo                 | 100                         | 59.5          | 41.4 <sup>a</sup> | 76.8 <sup>a</sup> | 6.3 <sup>a</sup>         | 8.4 <sup>a</sup> | 70.2                    | 29.8         | 63.5            | 45.0                 | 55.0       | 0     |
|                         | Infliximab 5 mg/kg      | 100                         | 64.5          | 42.4 <sup>a</sup> | 80.0 <sup>a</sup> | 5.9 <sup>a</sup>         | 8.5 <sup>a</sup> | 67.8                    | 37.2         | 57.9            | 47.1                 | 52.9       | 0     |
| ACT-2 <sup>1</sup>      | Placebo                 | 100                         | 57.7          | 39.3 <sup>a</sup> | 76.1 <sup>a</sup> | 6.5 <sup>a</sup>         | 8.5 <sup>a</sup> | 72.4                    | 28.5         | 48.8            | 41.7                 | 58.3       | 0     |
|                         | Infliximab 5 mg/kg      | 100                         | 62.8          | 40.5 <sup>a</sup> | 78.4 <sup>a</sup> | 6.7 <sup>a</sup>         | 8.3 <sup>a</sup> | 76.0                    | 33.9         | 49.6            | 40.7                 | 59.3       | 0     |
| ULTRA 1 <sup>2</sup>    | Placebo                 | 100                         | 63.1          | 37.0 <sup>b</sup> | 78.7 <sup>a</sup> | 5.4 <sup>b</sup>         | 8.7 <sup>a</sup> | 75.4                    | NR           | 67.6            | 56.2                 | 32.3       | 11.5  |
|                         | Adalimumab 160/80/40 mg | 100                         | 63.8          | 36.5 <sup>b</sup> | 75.5 <sup>a</sup> | 6.1 <sup>b</sup>         | 8.8 <sup>a</sup> | 80.8                    | NR           | 54.6            | 46.2                 | 46.9       | 6.9   |
| ULTRA 2 <sup>3</sup>    | Placebo                 | 59                          | 61.8          | 41.3 <sup>a</sup> | 77.1 <sup>a</sup> | 8.5 <sup>a</sup>         | 8.9 <sup>a</sup> | 63.0                    | 32.5         | 56.9            | 48.8                 | 39.0       | 12.2  |
|                         | Adalimumab 160/80/40 mg | 61                          | 57.3          | 39.6 <sup>a</sup> | 75.3 <sup>a</sup> | 8.1 <sup>a</sup>         | 8.9 <sup>a</sup> | 58.9                    | 37.5         | 60.5            | 48.4                 | 38.7       | 12.9  |
| PURSUIT-SC <sup>4</sup> | Placebo                 | 100                         | 52.9          | 39.0 <sup>a</sup> | NR                | 6.0 <sup>a</sup>         | 8.3 <sup>a</sup> | 83.4                    | 30.8         | 40.5            | 43.0                 | 57.0       | 0     |
|                         | Golimumab               | 100                         | 57.4          | 40.4 <sup>a</sup> | NR                | 6.4 <sup>a</sup>         | 8.5 <sup>a</sup> | 81.2                    | 31.3         | 43.9            | 41.8                 | 58.2       | 0     |
| GEMINI-1 <sup>6</sup>   | Placebo                 | 51                          | 62.0          | 41.2 <sup>a</sup> | 72.4              | 7.1 <sup>a</sup>         | 8.6 <sup>a</sup> | 61.1                    | 22.1         | 56.4            | 12.0                 | 39.5       | 48.5  |
|                         | Vedolizumab             | 58                          | 59.0          | 40.1 <sup>a</sup> | 72.4              | 6.1 <sup>a</sup>         | 8.5 <sup>a</sup> | 55.6                    | 26.2         | 56.0            | 11.1                 | 40.9       | 48.0  |

Note: The baseline characteristics presented for the GEMINI-1 and PURSUIT trials are provided as those listed in the induction phase. The baseline characteristics for the GEMINI-1 and ULTRA-2 trials were not stratified by prior anti-TNF experience and are therefore presented for the entire population.

<sup>a</sup>Mean; <sup>b</sup>Median.

**Abbreviations:** NR, not reported; NA, not applicable.

**Table S3.** Efficacy data from randomized controlled trials among anti-TNF-naïve patients with ulcerative colitis

| Trial                   | Treatment                         | Induction |           | Maintenance<br>("at risk" population<br>are patients starting<br>induction) |                        | Maintenance<br>("at risk" population<br>are patients starting<br>maintenance) |                        | Induction |                              |           |                | Maintenance |                |       |                                              |                                                        | Induction followed by maintenance |       |                                              |                                                        |
|-------------------------|-----------------------------------|-----------|-----------|-----------------------------------------------------------------------------|------------------------|-------------------------------------------------------------------------------|------------------------|-----------|------------------------------|-----------|----------------|-------------|----------------|-------|----------------------------------------------|--------------------------------------------------------|-----------------------------------|-------|----------------------------------------------|--------------------------------------------------------|
|                         |                                   | Response  | Remission | Sustained<br>response                                                       | Sustained<br>remission | Sustained<br>response                                                         | Sustained<br>remission | N         | Response,<br>no<br>remission | Remission | No<br>response | N           | N <sup>a</sup> | Other | Ind.<br>Remission<br>and Maint.<br>Remission | No Ind.<br>Response<br>and/or No<br>Maint.<br>Response | N                                 | Other | Ind.<br>Remission<br>and Maint.<br>Remission | No Ind.<br>Response<br>and/or No<br>Maint.<br>Response |
|                         |                                   |           |           |                                                                             |                        |                                                                               |                        |           |                              |           |                |             |                |       |                                              |                                                        |                                   |       |                                              |                                                        |
| ACT-1 <sup>1</sup>      | Placebo                           | 0.37      | 0.15      | 0.14                                                                        | 0.07                   |                                                                               |                        | 121       | 27                           | 18        | 76             | 121         |                | 9     | 8                                            | 104                                                    | 121                               | 9     | 8                                            | 104                                                    |
| ACT-1 <sup>1</sup>      | Infliximab 5<br>mg/kg             | 0.69      | 0.39      | 0.39                                                                        | 0.20                   |                                                                               |                        | 121       | 37                           | 47        | 37             | 121         |                | 23    | 24                                           | 74                                                     | 121                               | 23    | 24                                           | 74                                                     |
| ACT-2 <sup>1</sup>      | Placebo                           | 0.29      | 0.06      |                                                                             |                        |                                                                               |                        | 123       | 29                           | 7         | 87             |             |                |       |                                              |                                                        |                                   |       |                                              |                                                        |
| ACT-2 <sup>1</sup>      | Infliximab 5<br>mg/kg             | 0.65      | 0.34      |                                                                             |                        |                                                                               |                        | 121       | 37                           | 41        | 43             |             |                |       |                                              |                                                        |                                   |       |                                              |                                                        |
| ULTRA 1 <sup>2</sup>    | Placebo                           | 0.45      | 0.09      |                                                                             |                        |                                                                               |                        | 130       | 46                           | 12        | 72             |             |                |       |                                              |                                                        |                                   |       |                                              |                                                        |
| ULTRA 1 <sup>2</sup>    | Adalimumab<br>160/80/40 mg        | 0.55      | 0.18      |                                                                             |                        |                                                                               |                        | 130       | 47                           | 24        | 59             |             |                |       |                                              |                                                        |                                   |       |                                              |                                                        |
| ULTRA 2 <sup>3</sup>    | Placebo                           | 0.39      | 0.11      | 0.17                                                                        | 0.06                   |                                                                               |                        | 145       | 40                           | 16        | 89             | 145         |                | 15    | 9                                            | 121                                                    | 145                               | 15    | 9                                            | 121                                                    |
| ULTRA 2 <sup>3</sup>    | Adalimumab<br>160/80/40 mg        | 0.59      | 0.21      | 0.29                                                                        | 0.11                   |                                                                               |                        | 150       | 57                           | 32        | 61             | 150         |                | 28    | 16                                           | 106                                                    | 150                               | 28    | 16                                           | 106                                                    |
| PURSUIT-SC <sup>4</sup> | Placebo                           | 0.30      | 0.06      |                                                                             |                        |                                                                               |                        | 256       | 60                           | 16        | 180            |             |                |       |                                              |                                                        |                                   |       |                                              |                                                        |
| PURSUIT-SC <sup>4</sup> | Golimumab<br>200/100 mg           | 0.52      | 0.19      |                                                                             |                        |                                                                               |                        | 257       | 85                           | 48        | 124            |             |                |       |                                              |                                                        |                                   |       |                                              |                                                        |
| PURSUIT-M <sup>5</sup>  | Placebo                           |           |           |                                                                             |                        | 0.30                                                                          | 0.25                   |           |                              |           |                | 129         |                |       | 33                                           |                                                        | 256                               |       |                                              | 233                                                    |
| PURSUIT-M <sup>5</sup>  | Golimumab<br>200/100/100 mg       |           |           |                                                                             |                        | 0.50                                                                          | 0.39                   |           |                              |           |                | 151         | 54             |       | 21                                           |                                                        | 257                               |       |                                              | 191                                                    |
| GEMINI-1 <sup>6</sup>   | Placebo                           | 0.26      | 0.07      |                                                                             |                        | 0.35                                                                          | 0.05                   | 76        | 15                           | 5         | 56             | 20          |                | 6     | 1                                            |                                                        | 76                                | 6     | 1                                            | 69                                                     |
| GEMINI-1 <sup>6</sup>   | Vedolizumab 300<br>mg (induction) | 0.53      | 0.23      |                                                                             |                        |                                                                               |                        | 130       | 39                           | 30        | 61             |             |                |       |                                              |                                                        |                                   |       |                                              |                                                        |
| GEMINI-1 <sup>6</sup>   | Vedolizumab 300<br>mg q8          |           |           |                                                                             |                        | 0.65                                                                          | 0.22                   |           |                              |           |                | 72          |                | 31    | 16                                           |                                                        | 130                               | 30    | 15                                           | 85                                                     |

<sup>a</sup>For the PURSUIT-M trial, the N for the remission group does not equal the N for the response group (maintained clinical remission among those who were in clinical remission at baseline).

**Table S4.** Efficacy data from randomized controlled trials among anti-TNF-experienced patients with ulcerative colitis

| Trial                 | Treatment                         | Induction |           | Maintenance<br>("at risk" population are<br>patients starting<br>induction) |                        | Maintenance<br>("at risk" population are<br>patients starting<br>maintenance) |                        | Induction (used for analysis) |                              |           |                | Maintenance |       |                                              |                                                        | Induction followed by maintenance (used<br>for analysis) |       |                                              |                                                        |
|-----------------------|-----------------------------------|-----------|-----------|-----------------------------------------------------------------------------|------------------------|-------------------------------------------------------------------------------|------------------------|-------------------------------|------------------------------|-----------|----------------|-------------|-------|----------------------------------------------|--------------------------------------------------------|----------------------------------------------------------|-------|----------------------------------------------|--------------------------------------------------------|
|                       |                                   | Response  | Remission | Sustained<br>response                                                       | Sustained<br>remission | Sustained<br>response                                                         | Sustained<br>remission | N                             | Response,<br>no<br>remission | Remission | No<br>response | N           | Other | Ind.<br>Remission<br>and Maint.<br>Remission | No Ind.<br>Response<br>and/or No<br>Maint.<br>Response | N                                                        | Other | Ind.<br>Remission<br>and Maint.<br>Remission | No Ind.<br>Response<br>and/or No<br>Maint.<br>Response |
| ULTRA 2 <sup>3</sup>  | Placebo                           | 0.29      | 0.07      | 0.06                                                                        | 0.01                   |                                                                               |                        | 101                           | 22                           | 7         | 72             | 101         | 5     | 1                                            | 95                                                     | 101                                                      | 5     | 1                                            | 95                                                     |
| ULTRA 2 <sup>3</sup>  | Adalimumab<br>160/80/40 mg        | 0.37      | 0.09      | 0.15                                                                        | 0.05                   |                                                                               |                        | 98                            | 27                           | 9         | 62             | 98          | 10    | 5                                            | 83                                                     | 98                                                       | 10    | 5                                            | 83                                                     |
| GEMINI-1 <sup>6</sup> | Placebo                           | 0.21      | 0.03      |                                                                             |                        | 0.17                                                                          | 0.00                   | 63                            | 11                           | 2         | 50             | 18          | 3     | 0                                            |                                                        | 63                                                       | 2     | 0                                            | 61                                                     |
| GEMINI-1 <sup>6</sup> | Vedolizumab 300<br>mg (induction) | 0.39      | 0.10      |                                                                             |                        |                                                                               |                        | 82                            | 24                           | 8         | 50             |             |       |                                              |                                                        |                                                          |       |                                              |                                                        |
| GEMINI-1 <sup>6</sup> | Vedolizumab 300<br>mg q8 weeks    |           |           |                                                                             |                        | 0.47                                                                          | 0.21                   |                               |                              |           |                | 43          | 11    | 9                                            |                                                        | 82                                                       | 8     | 7                                            | 67                                                     |

**Figure S1.** Clinical response and remission as used in example analysis.

Only patients with a successful response to induction therapy continue with maintenance therapy. Sustained response and sustained remission among all patients with moderately to severely active ulcerative colitis starting induction therapy are the outcomes of interest used to calculate the number needed to treat.

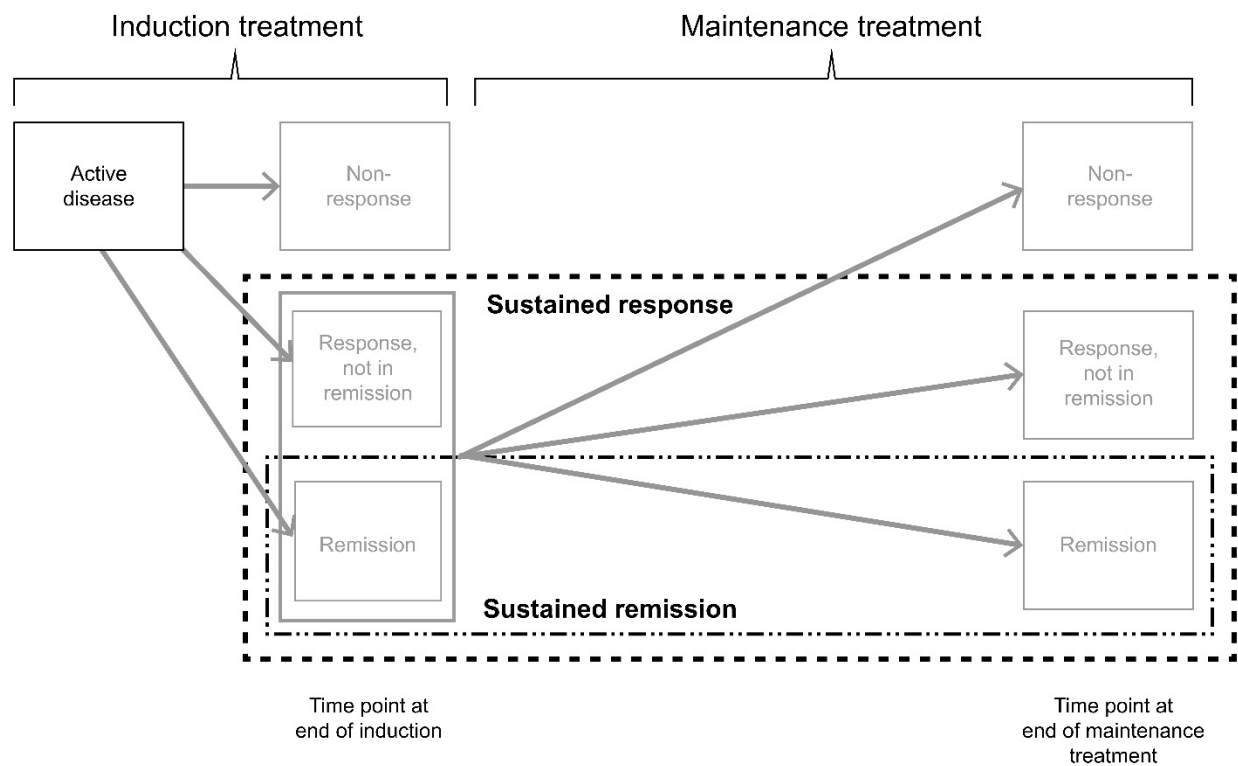

## References

1. Rutgeerts P, Sandborn WJ, Feagan BG, et al. Infliximab for induction and maintenance therapy for ulcerative colitis. *N Engl J Med*. 2005;353(23):2462-2476.
2. Reinisch W, Sandborn WJ, Hommes DW, et al. Adalimumab for induction of clinical remission in moderately to severely active ulcerative colitis: results of a randomised controlled trial. *Gut*. 2011;60(6):780-787.
3. Sandborn WJ, van Assche G, Reinisch W, et al. Adalimumab induces and maintains clinical remission in patients with moderate-to-severe ulcerative colitis. *Gastroenterology*. 2012;142(2):257-265 e251-253.
4. Sandborn WJ, Feagan BG, Marano C, et al. Subcutaneous golimumab induces clinical response and remission in patients with moderate-to-severe ulcerative colitis. *Gastroenterology*. 2014;146(1):85-95; quiz e14-85.
5. Sandborn WJ, Feagan BG, Marano C, et al. Subcutaneous golimumab maintains clinical response in patients with moderate-to-severe ulcerative colitis. *Gastroenterology*. 2014;146(1):96-109 e101.
6. Feagan BG, Rutgeerts P, Sands BE, et al. Vedolizumab as induction and maintenance therapy for ulcerative colitis. *N Engl J Med*. 2013;369(8):699-710.
